# Supplementary material for: Motherhood with cancer: A qualitative interview study on burdens and support needs among mothers with gynecological tumors
Source: Research Square preprint supplement (doi:10.21203/rs.3.rs-7904049/v1), 2025-11-25
Supplement: Supplementary file 1 [file 35104db0dd0f13b1489ef1e8.pdf]

## Interviewleitfaden zur Dissertation „Auswirkungen von Chemo- und Radiotherapie bei Müttern mit gynäkologischen Tumoren auf die Mutter-Kind-Beziehung“

### Einleitende Frage

1. Was waren zu Beginn ihrer Erkrankung Ihre größten Ängste, wenn Sie an Ihre Kinder gedacht haben?

### Auswirkungen auf Mutter-Kind-Beziehung

2. Haben Sie das Gefühl, das Verhältnis zu ihrem Kind hat sich im Vergleich zu der Zeit vor der Diagnose verändert?
3. Welche Herausforderungen müssen/mussten Sie und Ihr Kind seit Ihrer Diagnose gemeinsam im Alltag meistern?
4. Gab/Gibt es seit der Diagnose besonders schwierige Phasen/besonders schöne Phasen mit ihrem Kind?

### Kommunikation

5. Wie und wann haben Sie mit Ihrem Kind über Ihre Erkrankung gesprochen?
6. Ist dieses Gespräch/die Gespräche Ihnen schwergefallen?
7. Wie offen sollte man Ihrer Meinung nach mit dem Kind über dieses Thema reden?

### Unterstützung durch Umfeld

8. Fühlen Sie sich von ihrem Umfeld (Partner, Eltern, Freunde) in Bezug auf die Kindererziehung ausreichend unterstützt?
9. Ist das Thema „Kinder und Familie mit Krebs“ im Verlauf ihrer Krankheitsgeschichte von medizinischem und psychoonkologischem Fachpersonal (Ärzte, Pfleger, Psychologe) Ihrer Meinung nach ausreichend thematisiert worden?
10. Falls Sie in psychoonkologischer und/oder psychotherapeutischer Behandlung befinden, wie sind Sie dazu gekommen?

### Abschlussfrage

11. Hat sich Ihre Einstellung zum „Muttersein“ geändert? Haben Sie das Gefühl, eine andere Mutter zu sein als früher?
