# Supplementary material for: Motherhood with cancer: A qualitative interview study on burdens and support needs among mothers with gynecological tumors
Source: Research Square preprint supplement (doi:10.21203/rs.3.rs-7904049/v1), 2025-11-25
Supplement: Supplementary file 3 [file f73ca20a77e69495c2cea9db.pdf]

## Allgemeine personenbezogene Daten

### Teilnehmerin

|                                                           |                                                                                                                                                                                                                                                                                      |
|-----------------------------------------------------------|--------------------------------------------------------------------------------------------------------------------------------------------------------------------------------------------------------------------------------------------------------------------------------------|
| Geburtsdatum<br>(Monat/Jahr)                              | ____/____                                                                                                                                                                                                                                                                            |
| Familienstand                                             | <input type="checkbox"/> Ledig<br><input type="checkbox"/> Verheiratet<br><input type="checkbox"/> Eheähnliche Gemeinschaft<br><input type="checkbox"/> Geschieden<br><input type="checkbox"/> Verwitwet<br><input type="checkbox"/> Sonstiges: _____                                |
| Schulbildung                                              | <input type="checkbox"/> Kein Schulabschluss<br><input type="checkbox"/> Volks-/Hauptschule<br><input type="checkbox"/> Mittlere Reife<br><input type="checkbox"/> (Fach-)Abitur<br><input type="checkbox"/> Fachhochschule/Universität<br><input type="checkbox"/> Sonstiges: _____ |
| Erwerbstätigkeit vor Erkrankung                           | <input type="checkbox"/> Nein<br><input type="checkbox"/> Ja: _____<br>Wenn ja: <input type="checkbox"/> Vollzeit <input type="checkbox"/> Teilzeit                                                                                                                                  |
| Tumorart                                                  | <input type="checkbox"/> Brustkrebs<br><input type="checkbox"/> Gebärmutterhalskrebs<br><input type="checkbox"/> Eierstockkrebs<br><input type="checkbox"/> Sonstiges: _____                                                                                                         |
| Diagnosezeitpunkt                                         | _____                                                                                                                                                                                                                                                                                |
| Therapie                                                  | <input type="checkbox"/> Operative Therapie<br><input type="checkbox"/> Chemotherapie<br><input type="checkbox"/> Strahlentherapie<br><input type="checkbox"/> Sonstiges: _____                                                                                                      |
| Psychoonkologische oder<br>Psychotherapeutische Betreuung | <input type="checkbox"/> Ja<br><input type="checkbox"/> Nein                                                                                                                                                                                                                         |

### Kind

|                               |                                                                  |
|-------------------------------|------------------------------------------------------------------|
| Anzahl der Kinder             | _____                                                            |
| Alter der Kinder bei Diagnose | Erstes Kind: _____<br>Zweites Kind: _____<br>Drittes Kind: _____ |
| Geschlecht                    | Erstes Kind: _____<br>Zweites Kind: _____<br>Drittes Kind: _____ |
